# Supplementary material for: A biofilter for treating toluene vapors: performance evaluation and microbial counts behavior
Source: PeerJ. 2016 May 17;4:e2045. doi: 10.7717/peerj.2045 (PMC4878367; doi:10.7717/peerj.2045)
Supplement: Data S1 [file peerj-04-2045-s001.xlsx]

## Sheet: Figure 2
Figure 2
Inlet loading rate	Elimination capicity	Removal efficiency
g/(m3 h)	g/(m3 h)	%
3.64	3.43	94.2
4.37	4.25	97.3
5.1	4.71	92.5
5.58	5.4	96.8
6.07	5.79	95.4
13.11	12.14	92.6
13.83	12.84	92.8
15.29	14.24	93.1
16.5	15.09	91.4
17.48	15.76	90.2
22.09	19.7	89.2
23.54	20.81	88.4
25.49	23.12	90.7
27.43	24.52	89.4
29.37	25.87	88.1
32.04	28.39	88.6
33.25	29.83	89.7
34.22	30.18	88.2
35.44	31.15	87.9
37.14	32.38	87.2
42.96	33.73	78.5
43.2	32.52	75.3
44.42	33.84	76.2
45.87	35.95	78.4
46.12	35.12	76.2
54.85	31.34	57.1
56.8	31.27	55.1
62.38	30.41	48.8
65.29	29.78	45.6
66.02	30.79	46.6

## Sheet: Figure 3
Figure 3
EBRT	Removal efficiency		Elimination capacity
s	%		g/(m3 h)
	average value	standard error	average value	standard error
148.3	91.946	1.54621	22.3654	1.09265
74.2	89.16	1.21637	22.8061	1.15295
49.4	70.98	1.63277	17.9611	1.23787

## Sheet: Figure 4
Figure 4
Elimination capacity	CO2 production
g/(m3 h)	g/(m3 h)
3.43	3.43
4.25	6.375
4.71	3.297
5.4	7.56
5.79	11.001
12.14	15.782
12.84	17.976
14.24	18.512
15.09	18.108
15.76	22.064
19.7	35.46
20.81	24.972
23.12	32.368
24.52	24.52
25.87	28.457
28.39	36.907
29.83	44.745
30.18	39.234
31.15	43.61
32.38	35.618
33.73	64.087
32.52	48.78
33.84	30.456
35.95	46.735
35.12	59.704
31.34	37.608
31.27	40.651
30.41	45.615
29.78	56.582
30.79	55.422

## Sheet: Figure 5
Figure 5
Inlet loading rate	Elimination capacity		Removal efficiency		Elimination capacity		Removal efficiency		Elimination capacity		Removal efficiency
g/(m3 h)	g/(m3 h)		%		g/(m3 h)		%		g/(m3 h)		%
	Lower layer		Lower layer		Middle layer		Middle layer		Upper layer		Upper layer
	average value	standard error	average value	standard error	average value	standard error	average value	standard error	average value	standard error	average value	standard error
4.95	4.21	0.12	85.0505	2.42424	0.37	0.13	7.47475	2.62626	0.13	0.09	2.67475	1.81818
15.24	10.39	0.46	68.1758	3.01837	1.58	0.26	10.3674	1.70604	2.05	0.15	13.4567	0.98425
25.58	11.18	0.32	43.706	1.25098	7.52	0.23	29.398	0.89914	4.12	0.19	16.096	0.74277
34.42	12.25	0.14	35.5898	0.40674	8.16	0.19	23.7071	0.552	9.98	0.04	29.0031	0.11621
44.51	12.42	0.17	27.9038	0.38194	9.47	0.21	21.2761	0.4718	12.34	0.84	27.72	1.88722
61.07	13.13	0.29	21.4999	0.47486	9.89	0.34	16.1945	0.55674	7.88	0.32	12.9055	0.52399

## Sheet: Figure 6
Figure 6
EBRT	CO2 production		CO2 production		CO2 production
s	g/(m3 h)		g/(m3 h)		g/(m3 h)
	Lower layer		Middle layer		Upper layer
	average value	standard error	average value	standard error	average value	standard error
148.3	13.8263	0.953537	8.58183	1.43031	4.29092	1.43031
74.2	9.53537	1.43031	7.62829	1.43031	5.72122	0.953537
49.4	4.29092	1.43031	2.38384	0.476768	1.90707	1.43031

## Sheet: Figure 7
Figure 7
Time	Microbial count of fungi	Microbial count of fungi	Microbial count of fungi
days	CFU/g	CFU/g	CFU/g
	Lower layer	Middle layer	Upper layer
7	400	500	500
14	5000	900	500
21	25000	13500	3500
28	100000	20000	5000
36	350000	25000	6000
44	350000	30000	6000
53	400000	30000	10000
63	300000	30000	8000

## Sheet: Figure 8
Figure 8
Time	Microbial count of bacteria A	Microbial count of bacteria A	Microbial count of bacteria A	Time	Microbial count of bacteria B	Microbial count of bacteria B	Microbial count of bacteria B
days	CFU/g	CFU/g	CFU/g	days	CFU/g	CFU/g	CFU/g
	Lower layer	Middle layer	Upper layer		Lower layer	Middle layer	Upper layer
7	3000	1800	1200	7	4500	3000	2000
14	13000	6200	5400	14	3500	2000	5000
21	210000	180000	11000	21	12000	25000	44000
28	880000	320000	130000	28	30000	30000	75000
36	350000	270000	200000	36	20000	20000	80000
44	200000	290000	220000	44	18000	17000	78000
53	1300000	370000	200000	53	32000	33000	84000
63	480000	190000	180000	63	15000	16000	50000

## Sheet: Figure 9
Figure 9
Time	Pressure drop
Days	Pa/m
1	23.4568
2	24
3	24.6914
4	26.1111
5	28.3951
6	26
7	22.2222
8	24.7778
9	27.1605
10	26.4444
11	29.6296
12	28.7778
13	32.0988
14	30.5556
15	35.8025
16	36.3333
17	37.037
18	38
19	39.5062
20	39.8889
21	40.7407
22	41.6667
23	44.4444
24	46.4444
25	39.5062
26	43.2222
27	41.9753
28	41.7778
29	40.7407
30	42.3333
31	45.679
32	45.2222
33	46.9136
34	43.2222
35	38.2716
36	39.6667
37	41.9753
38	42.6667
39	44.4444
40	45.7778
41	48.1482
42	47.6667
43	45.679
44	43.7778
45	44.4444
46	43.5556
47	30.8642
48	29.7778
49	32.0988
50	31.8889
51	34.5679
52	35.7778
53	36.5556
54	79.0123
55	78.2222
56	79.0123
57	80.6667
58	82.716
59	84.8889
60	81.4815
61	83.7778
62	81.7778
63	80.4444
